# Supplementary material for: Oriented tubular metal–organic framework superstructures via conjugate acid–base pair-mediated growth regulation
Source: Royal Society of Chemistry journal article supplement (doi:10.1039/d5ta06542a), 2025-12-05
Supplement: d5ta06542a1.pdf [file d5ta06542a1.pdf]

Supplementary Information

## **Oriented tubular metal-organic framework superstructures via conjugate acid–base pair–mediated growth regulation**

*Giwook Lee,<sup>a</sup> Sheng Chen,<sup>\*b</sup> Jongkook Hwang<sup>\*a c</sup>*

<sup>a</sup> Department of Energy Systems Research, Ajou University, 206 Worldcup-ro, Yeongtong-gu, Suwon 16499, Republic of Korea

<sup>b</sup> Key Laboratory for Soft Chemistry and Functional Materials, School of Chemistry and Chemical Engineering, School of Energy and Power Engineering, Nanjing University of Science and Technology, Ministry of Education, Nanjing, 210094, China

<sup>c</sup> Department of Chemical Engineering, Ajou University, 206 Worldcup-ro, Yeongtong-gu, Suwon 16499, Republic of Korea

## Table of Contents

### Section 1. Supplementary Figures

|                 |                                                                                              |     |
|-----------------|----------------------------------------------------------------------------------------------|-----|
| <b>Fig. S1</b>  | Schematic illustration of ZnBD with Kagome crystal structure                                 | S3  |
| <b>Fig. S2</b>  | SEM and TEM images of OAc-AA-25                                                              | S4  |
| <b>Fig. S3</b>  | SEM images of OAc-AA-0                                                                       | S5  |
| <b>Fig. S4</b>  | N <sub>2</sub> sorption isotherm of OAc-AA-25                                                | S6  |
| <b>Fig. S5</b>  | Scale-up synthesis of OAc-AA-25                                                              | S7  |
| <b>Fig. S6</b>  | SEM image, XRD pattern, and N <sub>2</sub> sorption isotherm of OAc-AA-50                    | S8  |
| <b>Fig. S7</b>  | XRD patterns of OAc-AA- <i>x</i>                                                             | S9  |
| <b>Fig. S8</b>  | TEM images of OAc-AA-25 in 10 seconds                                                        | S10 |
| <b>Fig. S9</b>  | XRD patterns and N <sub>2</sub> sorption isotherms of OAc-AA-25 at different time intervals. | S11 |
| <b>Fig. S10</b> | SEM images of NO <sub>3</sub> -AA-25, OAc-FA-25, and Cl-AA-25                                | S12 |
| <b>Fig. S11</b> | SEM images and XRD pattern of NO <sub>3</sub> -AA-0                                          | S13 |
| <b>Fig. S12</b> | SEM images and XRD pattern of OAc-BA-25                                                      | S14 |
| <b>Fig. S13</b> | SEM images and XRD pattern of OAc-AA-25-NA                                                   | S15 |
| <b>Fig. S14</b> | Schematic illustration of morphogenesis of ZnBD in conjugate acid–base pair                  | S16 |
| <b>Fig. S15</b> | SEM image, XRD pattern, and N <sub>2</sub> sorption isotherm of OAc-AA-25-NH <sub>2</sub>    | S17 |
| <b>Fig. S16</b> | SEM image, XRD pattern, and N <sub>2</sub> sorption isotherm of Co-OAc-AA-50                 | S18 |
| <b>Fig. S17</b> | Cyclic CO <sub>2</sub> adsorption–desorption performance of OAc-AA-25                        | S19 |

### Section 2. Supplementary Tables

|                 |                                                                                                   |     |
|-----------------|---------------------------------------------------------------------------------------------------|-----|
| <b>Table S1</b> | BET surface area, total pore volume of ZnBDs                                                      | S20 |
| <b>Table S2</b> | Production yield of ZnBDs                                                                         | S21 |
| <b>Table S3</b> | CO <sub>2</sub> uptake and CO <sub>2</sub> /N <sub>2</sub> selectivity of OAc-AA-25 and OAc-AA-0. | S22 |

**References**.....

## Section 1. Supplementary Figures

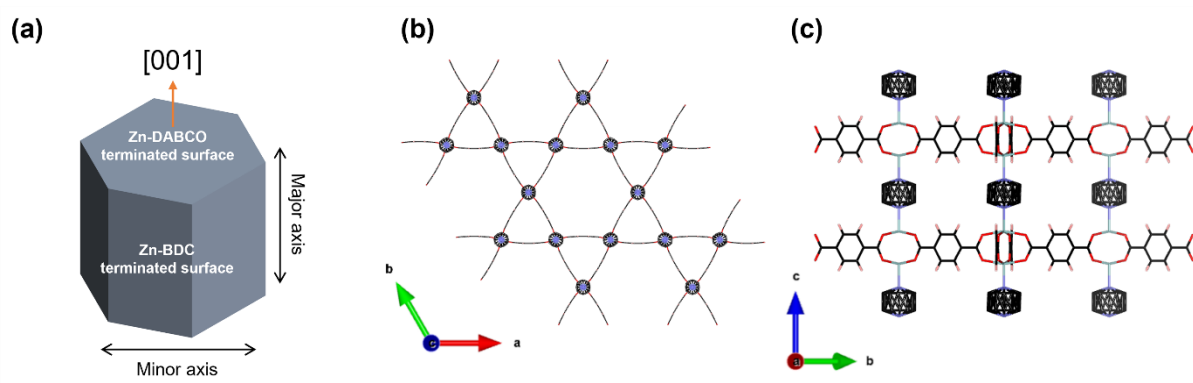

**Fig. S1** Schematic illustration of ZnBD with Kagome crystal structure. Crystal formula  $C_{22}H_{20}N_2O_8Zn_2$ ,  $M = 571.14$ , hexagonal, space group  $P\bar{3}m1$  (No. 164),  $a = 21.620(1) \text{ \AA}$ ,  $c = 9.628(1) \text{ \AA}$ ,  $V = 3897.3(5) \text{ \AA}^3$ ,  $Z = 3$ ,  $T = 173 \text{ K}$ ,  $\rho_{\text{calcd}} = 0.73 \text{ g/cm}^3$ ,  $F(000) = 870$ ,  $\mu (\text{Mo K}\alpha) = 0.95 \text{ mm}^{-1}$ , 2736 reflections observed [ $I > 2\sigma(I)$ ];  $R1 = 0.0520$ ,  $wR2 = 0.1790$ .<sup>S1</sup>

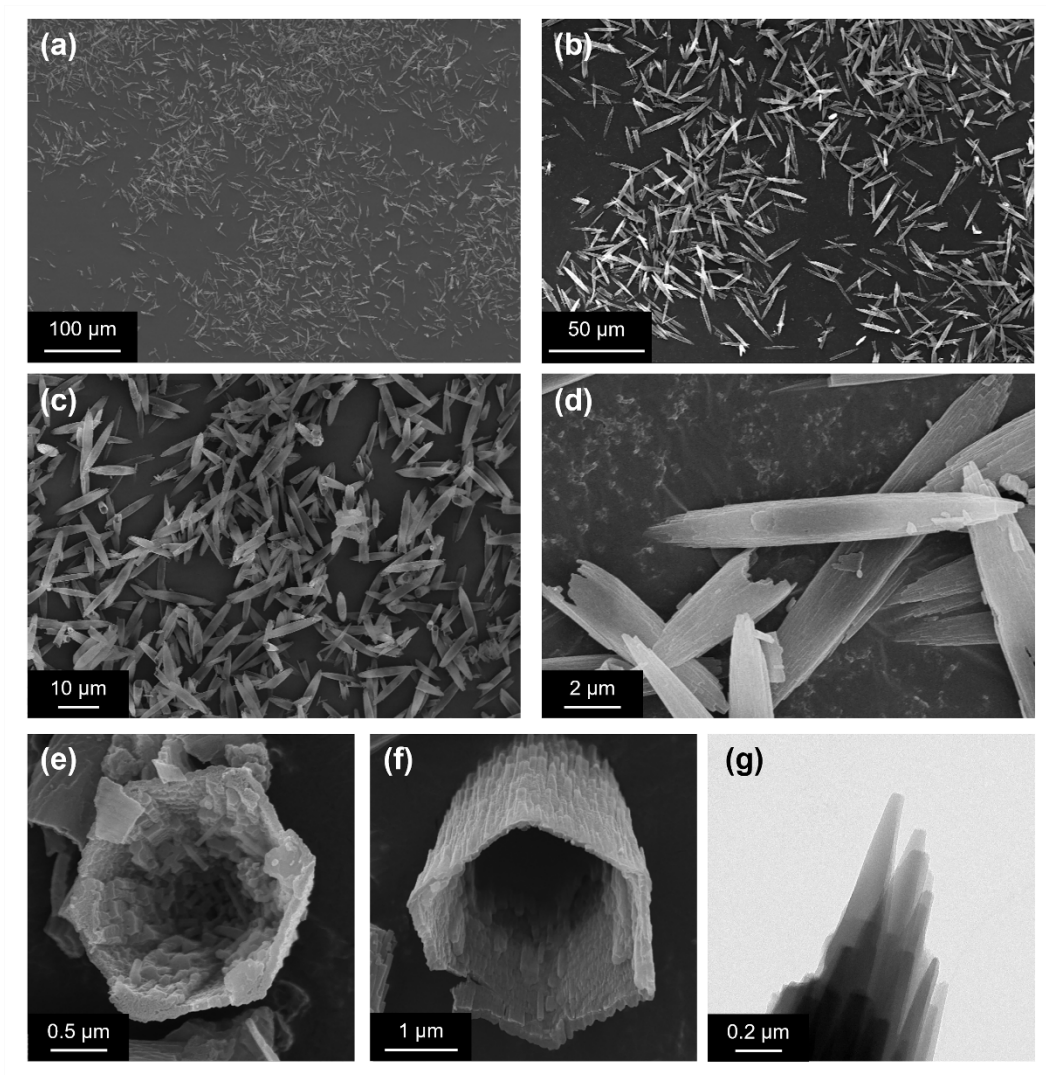

**Fig. S2** SEM images at varying magnifications (a–d), cross-section (e, f) and TEM image (g) of OAc-AA-25.

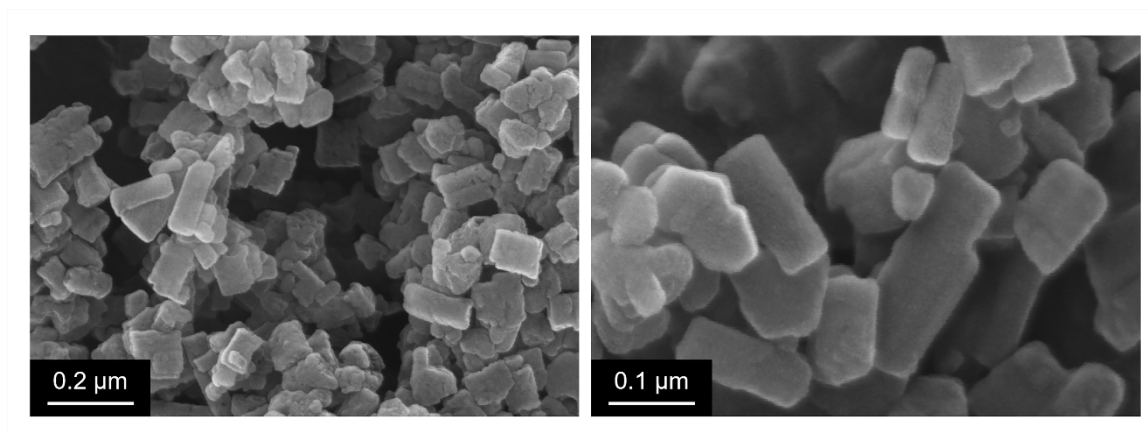

**Fig. S3** SEM images at varying magnifications of OAc-AA-0.

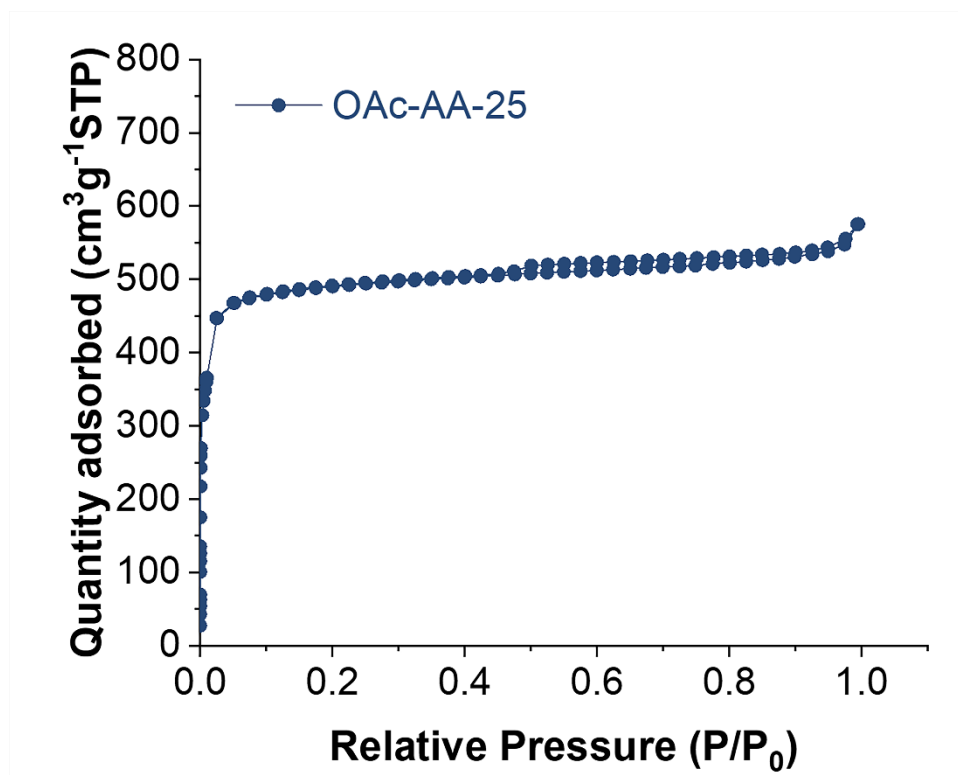

**Fig. S4** N<sub>2</sub> sorption isotherm of OAc-AA-25 at 77 K.

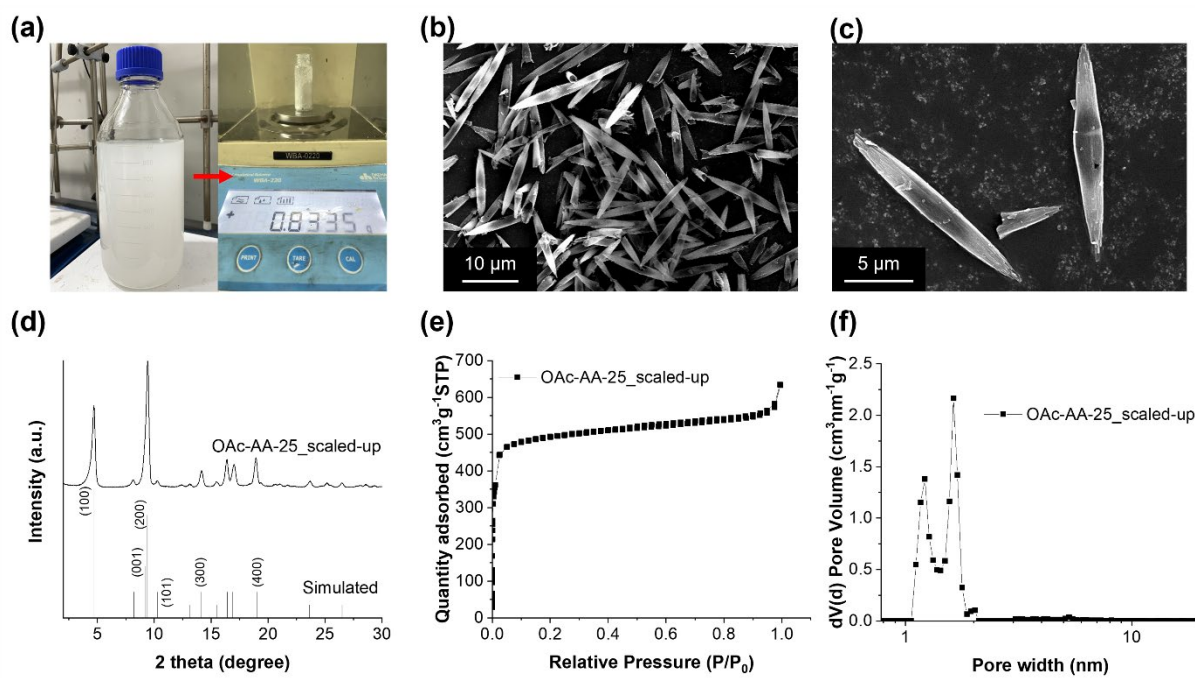

**Fig. S5** Scale-up synthesis of OAc-AA-25. For scale-up synthesis, the OAc-AA-25 conditions were scaled up by a factor of 6 (a). SEM images of scaled up OAc-AA-25 (b, c) and corresponding XRD pattern (d), N<sub>2</sub> sorption isotherm at 77 K (e), and pore size distribution (f).

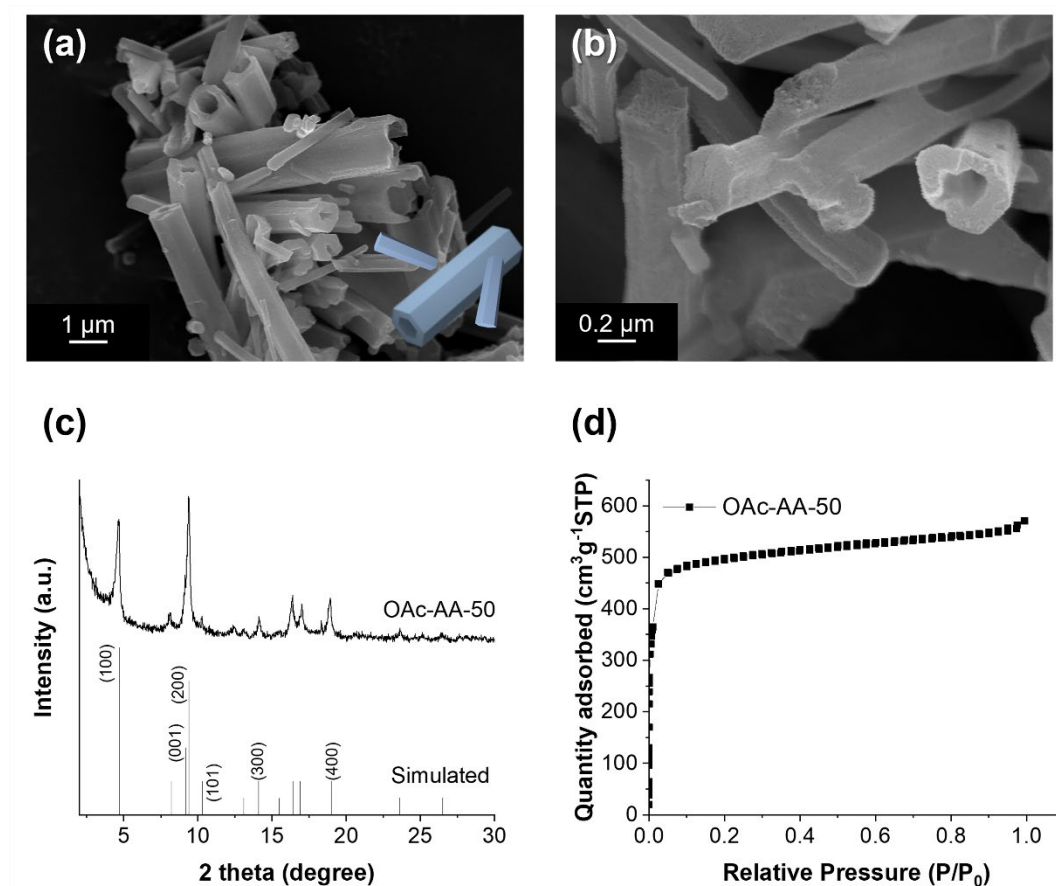

**Fig. S6** SEM image (a, b) of OAc-AA-50, corresponding XRD pattern (c) and  $\text{N}_2$  sorption isotherm at 77 K (d).



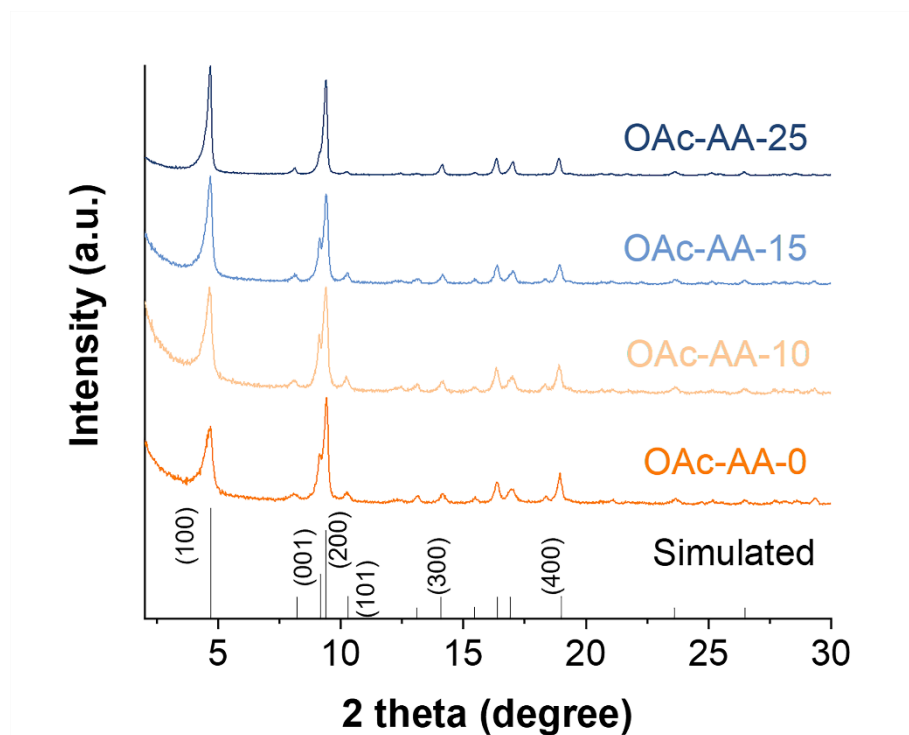

**Fig. S7** XRD patterns of OAc-AA-*x*.

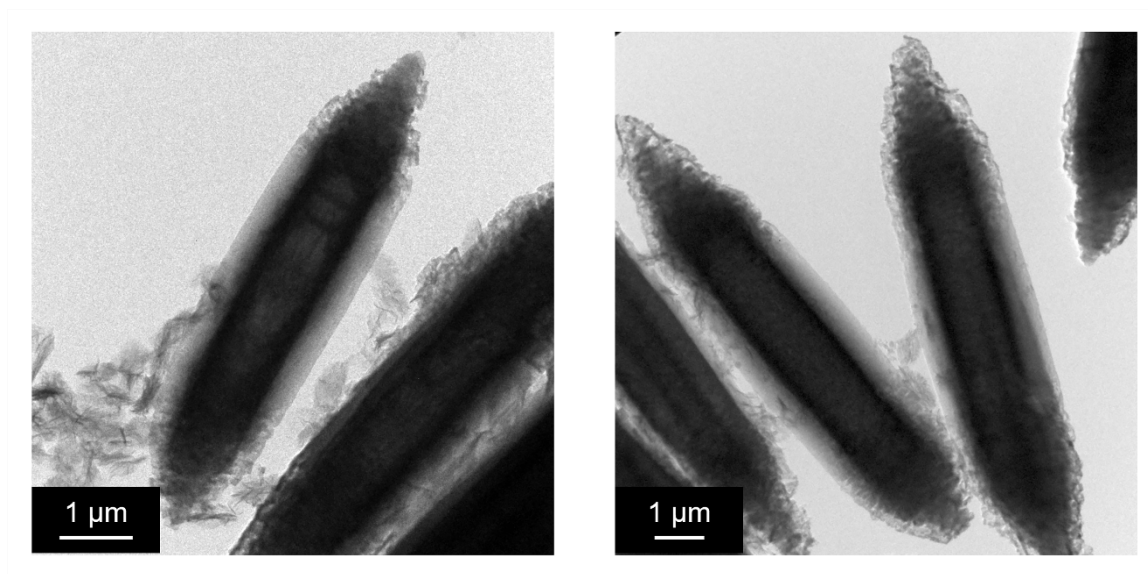

**Fig. S8** TEM images of OAc-AA-25 in 10 seconds.

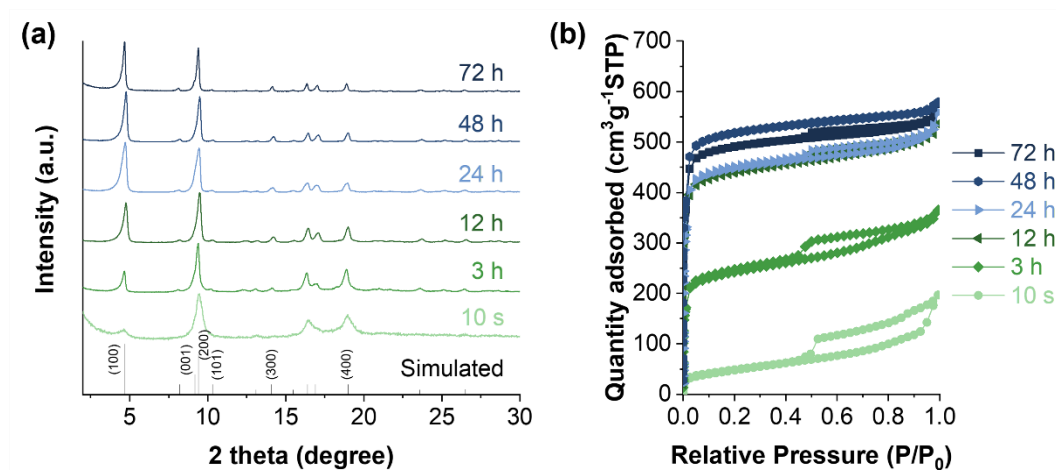

**Fig. S9** XRD patterns (a) and N<sub>2</sub> sorption isotherms at 77 K (b) of OAc-AA-25 collected at different time intervals.

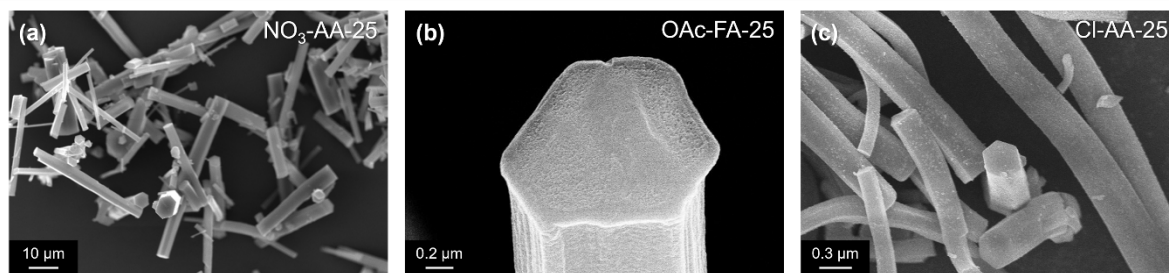

**Fig. S10** SEM images of NO<sub>3</sub>-AA-25 (a), OAc-FA-25 (b), and Cl-AA-25 (c).

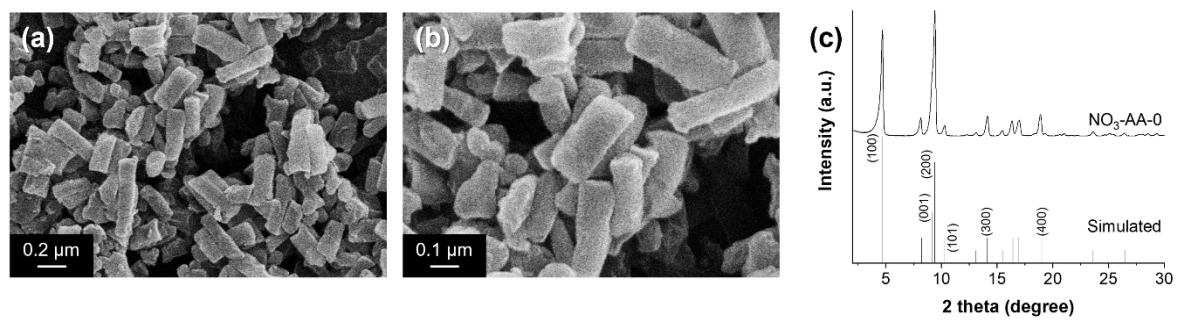

**Fig. S11** SEM images at varying magnifications of  $\text{NO}_3\text{-AA-0}$  (a, b) and corresponding XRD pattern (c).

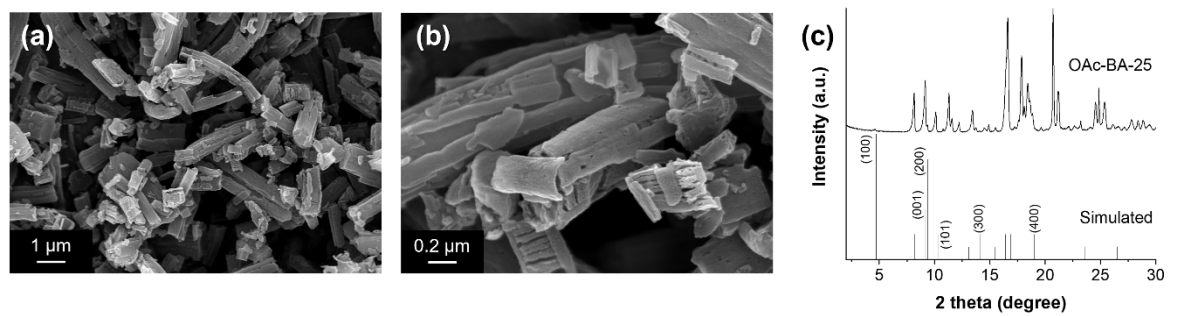

**Fig. S12** SEM images at varying magnifications of OAc-BA-25 (a, b) and corresponding XRD pattern (c).

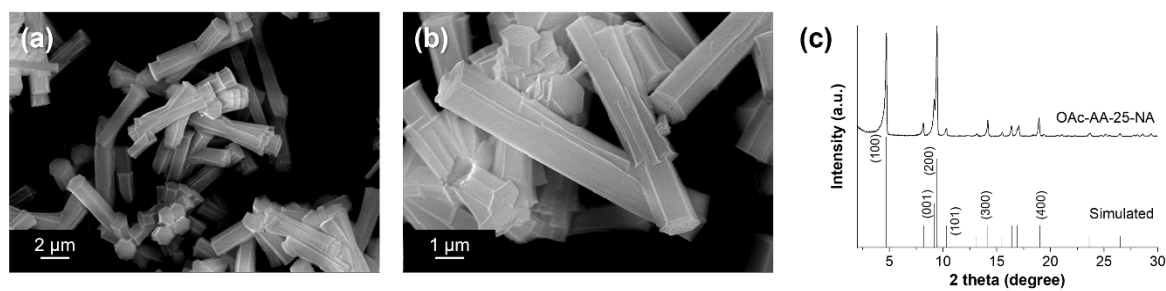

**Fig. S13** SEM images at varying magnifications of OAc-AA-25-NA (a, b) and corresponding XRD pattern (c).

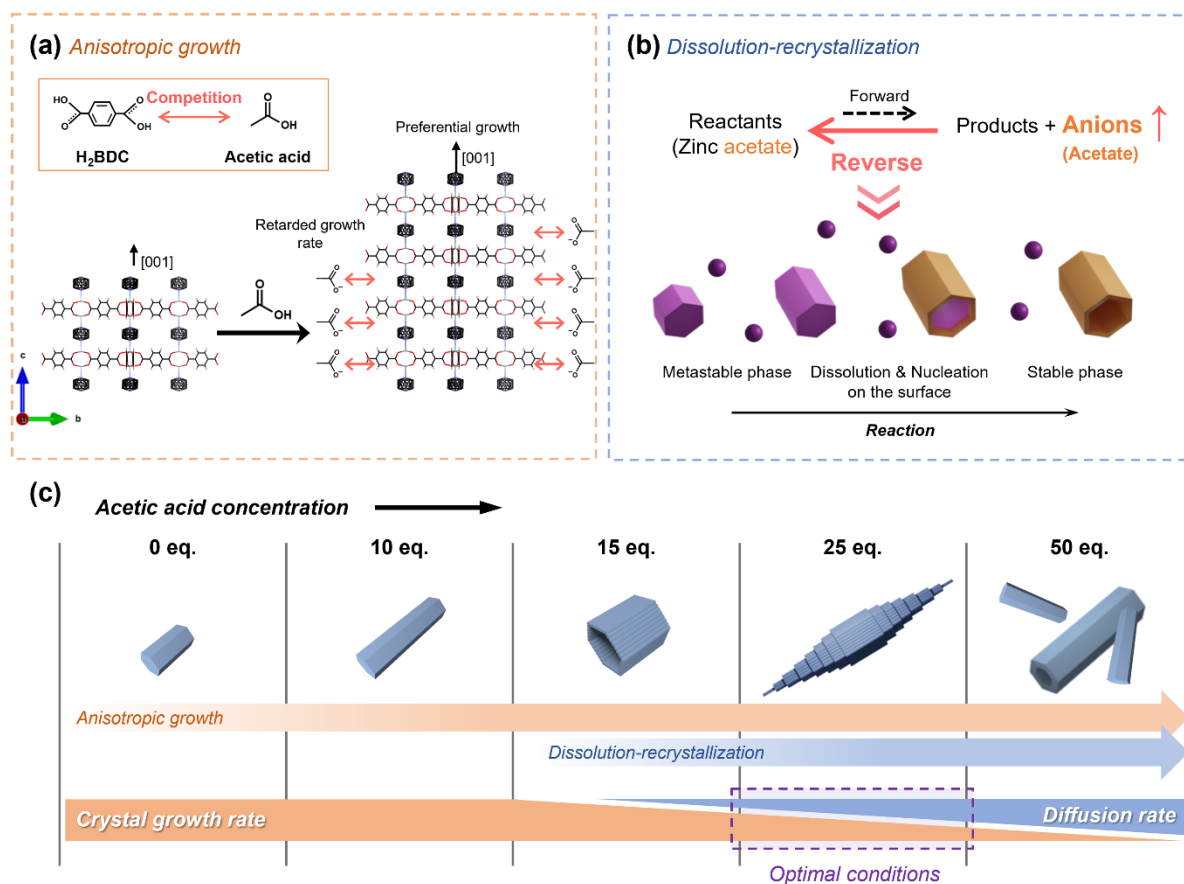

**Fig. S14** Morphogenesis of ZnBD mediated by anisotropic growth (a) and dissolution-recrystallization (b), and the optimal conditions for the formation of oriented hollow superstructures in conjugate acid-base pair (c).



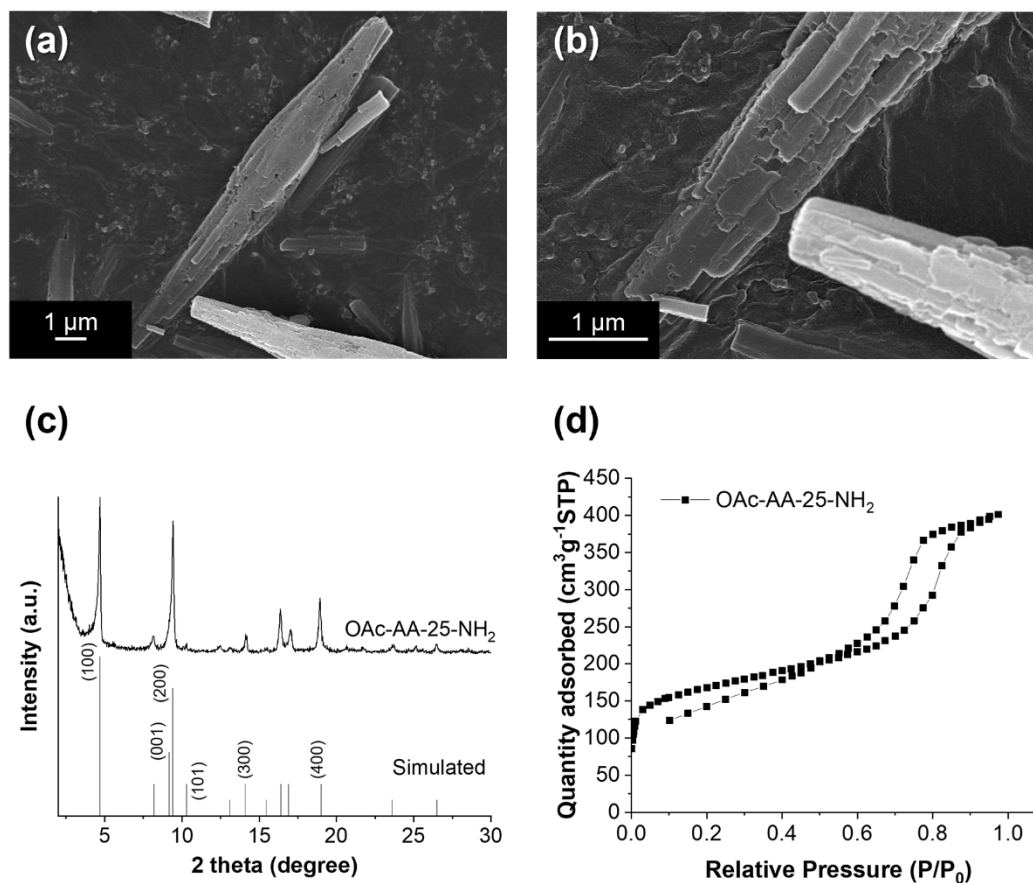

**Fig. S15** SEM image of OAc-AA-25-NH<sub>2</sub> (a) corresponding XRD pattern (b) and N<sub>2</sub> sorption isotherm at 77 K (c).

We substituted the BDC ligand with 2-aminoterephthalic acid (ATA) ligand to synthesize  $[\text{Zn}_2(\text{ATA})_2\text{DABCO}]_n$  with oriented superstructure morphologies (denoted as OAc-AA-25-NH<sub>2</sub>). In this system, a conjugate acid–base pair was generated in situ from zinc acetate and acetic acid at a 1:25 molar ratio prior to the introduction of the organic linkers. The resulting OAc-AA-25-NH<sub>2</sub> sample exhibits oriented superstructures constructed from arrays of anisotropic nanorods. Powder XRD patterns and N<sub>2</sub> adsorption isotherms confirm the high crystallinity and permanent porosity of OAc-AA-25-NH<sub>2</sub>, with a BET surface area of 619 m<sup>2</sup> g<sup>-1</sup>.

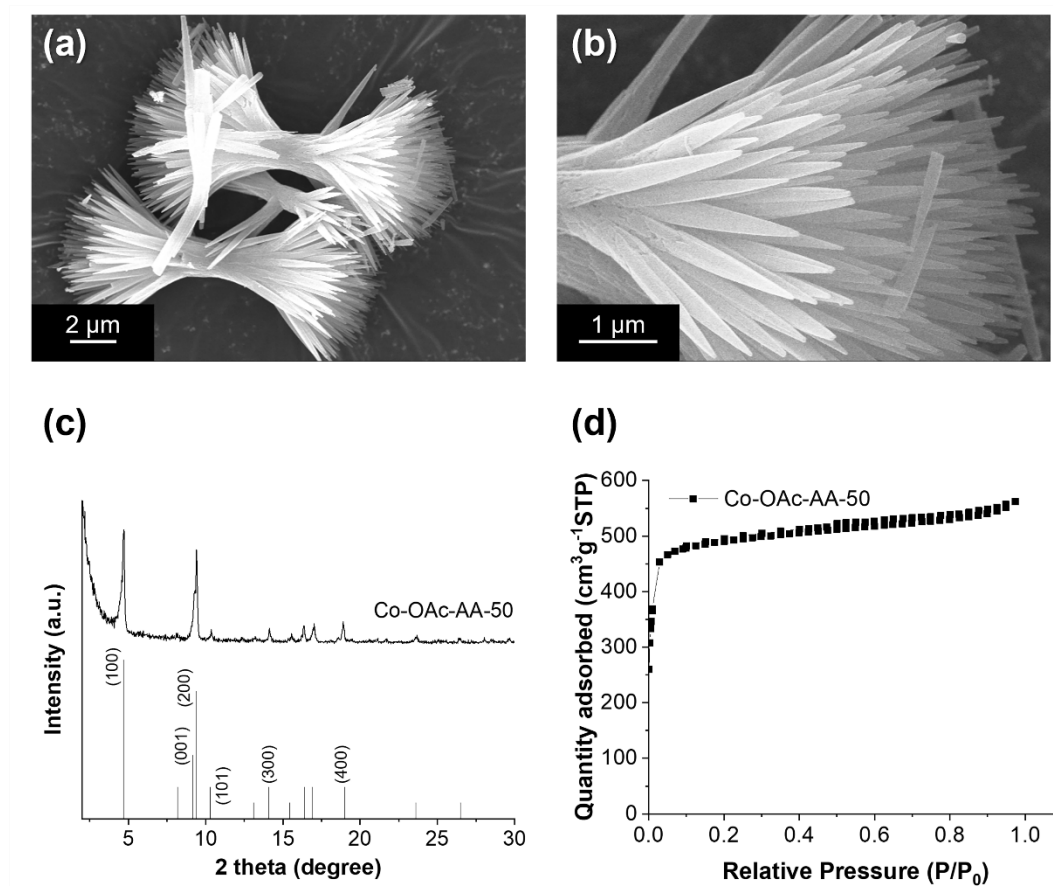

**Fig. S16** SEM image of Co-OAc-AA-50 (a) corresponding XRD pattern (b) and N<sub>2</sub> sorption isotherm at 77 K (c).

We substituted the zinc acetate with cobalt acetate to synthesize  $[\text{Co}_2(\text{BDC})_2\text{DABCO}]_n$  with oriented superstructure morphologies (denoted as Co-OAc-AA-50). In this system, a conjugate acid–base pair was generated in situ from cobalt acetate and acetic acid at a 1:50 molar ratio prior to the introduction of the organic linkers. The resulting Co-OAc-AA-50 sample exhibits hierarchical superstructures constructed from anisotropic nanorods with low degree of orientation. Powder XRD patterns and N<sub>2</sub> adsorption isotherms confirm the high crystallinity and permanent porosity of Co-OAc-AA-50, with a BET surface area of 2015 m<sup>2</sup> g<sup>-1</sup>.

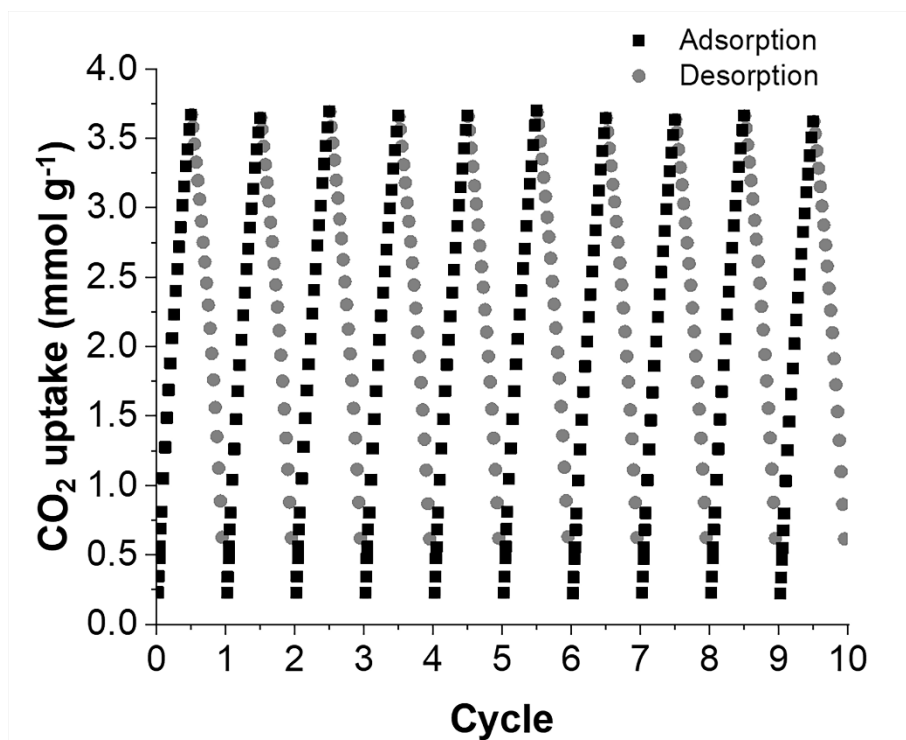

**Fig. S17** Cyclic CO<sub>2</sub> adsorption–desorption performance of OAc-AA-25 for 10 cycles at 273

K.

## Section 2. Supplementary Tables

**Table S1.** BET surface area, total pore volume of ZnBDs reported in this work and previous literature, determined by nitrogen physisorption.

|                     | BET Surface Area<br>(m <sup>2</sup> g <sup>-1</sup> ) | Total pore Volume <sup>1</sup><br>(cm <sup>3</sup> g <sup>-1</sup> ) | Ref.      |
|---------------------|-------------------------------------------------------|----------------------------------------------------------------------|-----------|
| OAc-AA-0            | 1401                                                  | 0.731                                                                | This work |
| OAc-AA-10           | 1385                                                  | 0.775                                                                | This work |
| OAc-AA-15           | 1598                                                  | 0.799                                                                | This work |
| OAc-AA-25           | 2008                                                  | 0.835                                                                | This work |
| OAc-AA-50           | 2021                                                  | 0.854                                                                | This work |
| OAc-AA-25_scaled-up | 2003                                                  | 0.865                                                                | This work |
| ZBDh                | 1603                                                  | 0.86                                                                 | S1        |
| Zn-rt               | 1911                                                  | 0.71                                                                 | S2        |
| ZnBDh-D10           | 2160                                                  | -                                                                    | S3        |
| ZnBD-DMF            | 2104                                                  | 0.8                                                                  | S4        |

<sup>1</sup> Determined at  $P/P_0=0.95$

**Table S2.** Production yield of S-A-x.

|                        | Yield <sup>1</sup> (%) |
|------------------------|------------------------|
| OAc-AA-0               | 17                     |
| OAc-AA-10              | 62                     |
| OAc-AA-15              | 95                     |
| OAc-AA-25              | 93                     |
| OAc-AA-50              | 96                     |
| OAc-AA-25_scaled-up    | 80                     |
| NO <sub>3</sub> -AA-0  | 4                      |
| NO <sub>3</sub> -AA-25 | 5                      |
| OAc-FA-25              | 50                     |
| NO <sub>3</sub> -NA-25 | 0                      |
| NO <sub>3</sub> -FA-25 | 0                      |
| Cl-FA-25               | 0                      |
| Cl-AA-25               | 8                      |
| OFm-FA-25              | 0                      |
| OAc-BA-25              | 50                     |

<sup>1</sup> Yield = actual yield/ theoretical yield \* 100

**Table S3.** CO<sub>2</sub> uptake and CO<sub>2</sub>/N<sub>2</sub> selectivity of OAc-AA-25 and OAc-AA-0 at 273 K.

|           | CO <sub>2</sub> uptake<br>(0.15 bar) | CO <sub>2</sub> uptake<br>(1 bar) | CO <sub>2</sub> /N <sub>2</sub> selectivity <sup>1</sup><br>(15/85) |
|-----------|--------------------------------------|-----------------------------------|---------------------------------------------------------------------|
| OAc-AA-25 | 0.850                                | 3.799                             | 19                                                                  |
| OAc-AA-0  | 0.607                                | 2.583                             | 18                                                                  |

<sup>1</sup> Calculated by IAST;  $S_{CO_2/N_2} = (x_{CO_2}/y_{CO_2})/(x_{N_2}/y_{N_2})$ ,  $x_i$  is the amount of each component in the adsorbed state and  $y_i$  is the molar fraction of each component in the gaseous state at equilibrium.

## References

- S1. H. Chun and J. Moon, *Inorg. Chem.*, 2007, **46**, 4371-4373.
- S2. K. Zhou, S. Chaemchuen, Z. Wu and F. Verpoort, *Microporous Mesoporous Mater.*, 2017, **239**, 28-33.
- S3. J. Hwang, R. Yan, M. Oschatz and B. V. K. J. Schmidt, *J. Mater. Chem. A*, 2018, **6**, 23521-23530.
- S4. J. Hungerford and K. S. Walton, *Inorg. Chem.*, 2019, **58**, 7690-7697.
